# Supplementary material for: A high throughput screening method for the selection of zeolites for binding cations
Source: Royal Society of Chemistry journal article supplement (doi:10.1039/b506044c), 2005-01-01
Supplement: b506044c.pdf [file b506044c.pdf]

## A High Throughput Screening Method for the Selection of Zeolites for Binding Cations

Edel M. Minogue\*, Tammy P. Taylor, Anthony K. Burrell, George J. Havrilla,  
Benjamin P. Warner, Michael T. Janicke

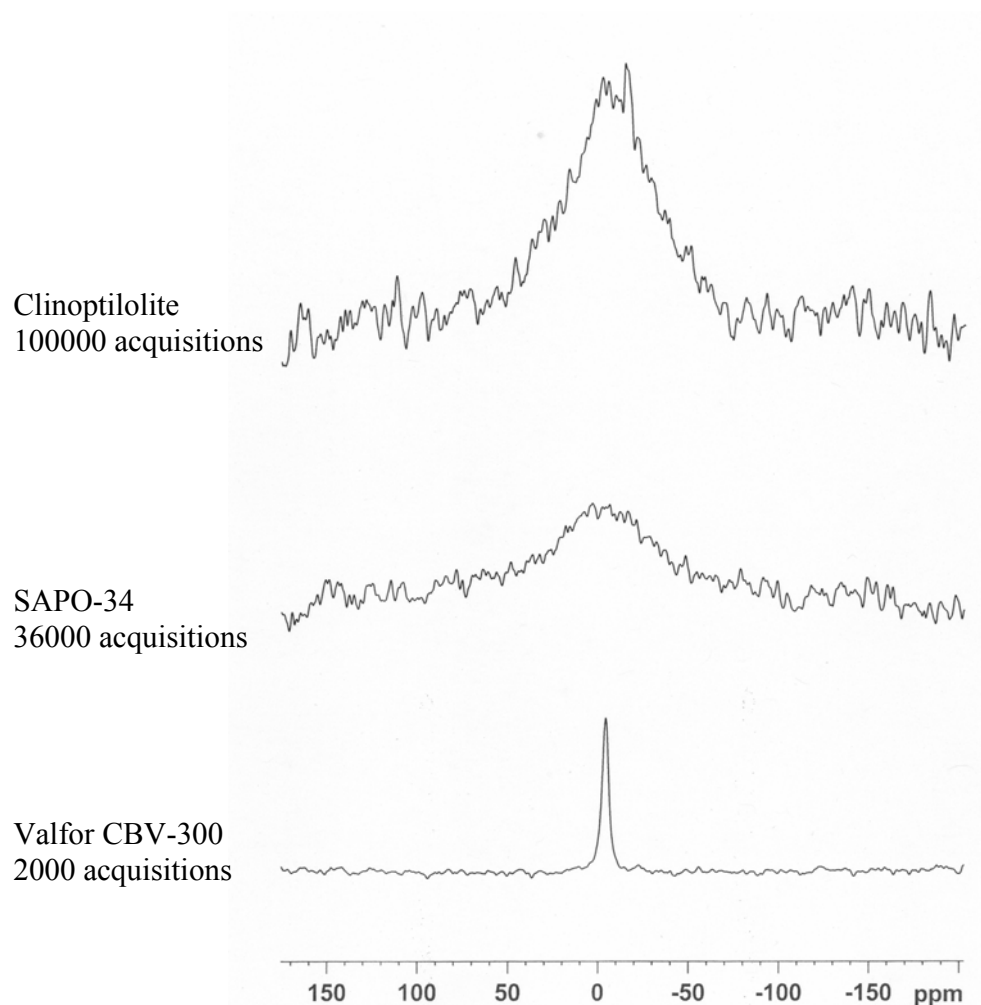

$^{133}\text{Cs}$  Magic-Angle Spinning spectra for cesium loaded zeolite/molecular sieve materials. Data were collected using a Hahn Echo sequence with the  $90^\circ$  pulse equal to 5.3 msec. The samples were spinning at 10 kHz and the pulse delay between the  $90^\circ$  and  $180^\circ$  pulses was 10 rotor cycles. The recycle delay was 0.5 sec and the resonance frequency was 52.45 MHz. Spectra are referenced to dilute CsCl solution. Differing number of acquisitions were necessary for the different materials depending on the width of the spectral lines and the amount of cesium in the samples. Materials that had not been cesium-exchanged were measured and showed no signals for  $^{133}\text{Cs}$ .
